# Supplementary material for: Optimization of Fermentation Conditions and Media for Production of Glucose Isomerase from Bacillus megaterium Using Response Surface Methodology
Source: Scientifica (Cairo). 2018 Sep 2;2018:6842843. doi: 10.1155/2018/6842843 (PMC6139186; doi:10.1155/2018/6842843)
Supplement: Supplementary Materials — Raw data that demonstrated bacterial growth and the effect of single factor including concentrations of D-xylose, K2HPO4, MgSO4·7H2O, yeast extract, and peptone, as well as pH, bacterial inoculation size, temperature, rotation rate on glucose isomerase activity are available in excel sheets of supplementary files (Figures S1–S10). [file 6842843.f1.xlsx]

## Sheet: Figure 1
Cell density of Bacillus megaterium during cultivation time
Raw data
Time (hours)	Log10 CFU.mL-1 ( 1st time)	Log10 CFU.mL-1 ( 2nd time)	Mean	STD	Significant
0	5.78247	5.7839	5.78319	0.00101184	a
2	5.78533	5.78817	5.78675	0.00200715	a
4	5.8451	5.85126	5.84818	0.004356	b
6	6.12057	6.12385	6.12221	0.00231769	c
8	6.58883	6.58433	6.58658	0.00318233	d
10	7.09691	7.10721	7.10206	0.00728317	e
12	7.4216	7.41162	7.41661	0.00705991	f
14	7.67943	7.68305	7.68124	0.00255912	g
16	7.86332	7.8451	7.85421	0.0128869	h
18	7.97772	7.99123	7.98447	0.00954769	i
20	8.1271	8.13672	8.13191	0.00679938	n
22	8.2014	8.20683	8.20411	0.00383871	r
24	8.1959	8.19866	8.19728	0.0019498	r
26	8.19312	8.19866	8.19589	0.00391206	qr
28	8.19033	8.17898	8.18465	0.00802902	pq
30	8.17609	8.16732	8.1717	0.0062041	op
32	8.17026	8.16435	8.16731	0.00417819	o
34	8.13033	8.13988	8.13511	0.00674956	n
36	8.1271	8.11394	8.12052	0.00930655	m
38	8.1038	8.09342	8.09861	0.00734121	k
40	8.06446	8.04922	8.05684	0.0107763	j

## Sheet: Figure 2
The effect of D-xylose concentration on glucose isomerase activity
Raw data
D-xylose (%)	0	0.5	1	1.5	2	2.5
Enzymatic activity (U/mg biomass)
First time	0.231	0.232	0.258	0.252	0.233	0.234
Second time	0.225	0.234	0.254	0.258	0.235	0.232
Average	0.228	0.233	0.256	0.255	0.234	0.233
STD	0.00424264	0.00141421	0.00282843	0.00424264	0.00141421	0.00141421
Significant	a	a	b	b	a	a

## Sheet: Figure 3
The effect of K2HPO4 concentration on glucose isomerase activity
Raw data
K2HPO4 (%)	0	0.1	0.2	0.3	0.4	0.5
Enzymatic activity (U/mg biomass)
First time	0.221	0.228	0.25	0.226	0.207	0.21
Second time	0.216	0.226	0.246	0.223	0.204	0.203
Average	0.219	0.227	0.248	0.225	0.206	0.207
STD	0.00353553	0.00141421	0.00282843	0.00212132	0.00212132	0.00494975
Significant	a	b	c	ab	d	d

## Sheet: Figure 4
The effect of MgSO4.7H2O concentration on glucose isomerase activity
Raw data
MgSO4.7H2O (%)	0	0.05	0.1	0.15	0.2	0.25
Enzymatic activity (U/mg biomass)
First time	0.224	0.227	0.272	0.247	0.213	0.2
Second time	0.221	0.233	0.256	0.249	0.203	0.197
Average	0.2225	0.23	0.264	0.248	0.208	0.1985
STD	0.00212132	0.00424264	0.0113137	0.00141421	0.00707107	0.00212132
Significant	a	a	b	c	d	d

## Sheet: Figure 5
The effect of yeast extract concentration on glucose isomerase activity
Raw data
Yeast extract (%)	0	0.25	0.5	0.75	1	1.25
Enzymatic activity (U/mg biomass)
First time	0.223	0.226	0.244	0.251	0.269	0.241
Second time	0.224	0.223	0.241	0.246	0.27	0.244
Average	0.224	0.225	0.243	0.249	0.27	0.243
STD	0.000707107	0.00212132	0.00212132	0.00353553	0.000707107	0.00212132
Significant	a	a	b	c	d	b

## Sheet: Figure 6
The effect of peptone concentration on glucose isomerase activity
Raw data
Peptone (%)	0	0.5	1	1.5	2	2.5
Enzymatic activity (U/mg biomass)
First time	0.18	0.229	0.265	0.237	0.21	0.196
Second time	0.183	0.227	0.26	0.238	0.206	0.199
Average	0.182	0.228	0.263	0.238	0.208	0.198
STD	0.00212132	0.00141421	0.00353553	0.000707107	0.00282843	0.00212132
Significant	a	b	c	d	e	f

## Sheet: Figure 7
The effect of pH on glucose isomerase activity
Raw data
pH	5.5	6	6.5	7	7.5	8
Enzymatic activity (U/mg biomass)
First time	0.175	0.215	0.225	0.242	0.193	0.184
Second time	0.176	0.212	0.222	0.243	0.195	0.186
Average	0.176	0.214	0.224	0.243	0.194	0.185
STD	0.000707107	0.00212132	0.00212132	0.000707107	0.00141421	0.00141421
Significant	a	b	c	d	e	f

## Sheet: Figure 8
The effect of bacterial inoculation size on glucose isomerase activity
Raw data
Bacterial inoculum size (%)	5	10	15	20	25	30
Enzymatic activity (U/mg biomass)
First time	0.144	0.155	0.199	0.257	0.214	0.201
Second time	0.138	0.16	0.201	0.262	0.201	0.204
Mean	0.141	0.158	0.2	0.26	0.2075	0.203
STD	0.00424264	0.00353553	0.00141421	0.00353553	0.00919239	0.00212132
Significant	a	b	c	d	c	c

## Sheet: Figure 9
The effect of temperature on glucose isomerase activity
Raw data
Temperature (oC)	33	35	37	39	41	43
Enzymatic activity (U/mg biomass)
First time	0.153	0.203	0.259	0.238	0.225	0.22
Second time	0.167	0.201	0.264	0.237	0.227	0.192
Mean	0.16	0.202	0.262	0.238	0.226	0.206
STD	0.00989949	0.00141421	0.00353553	0.001	0.00141421	0.019799
Significant	a	b	e	d	cd	bc

## Sheet: Figure 10
The effect of rotation rate on glucose isomerase activity
Raw data
Rotation rate (rpm)	80	100	120	140	160	180
Enzymatic activity (U/mg biomass)
First time	0.206	0.221	0.249	0.246	0.229	0.204
Second time	0.212	0.223	0.247	0.232	0.233	0.206
Mean	0.209	0.222	0.248	0.239	0.231	0.205
STD	0.00424264	0.00141421	0.00141421	0.00989949	0.00282843	0.00141421
Significant	a	b	d	cd	bc	a
